# Supplementary material for: Analysis of self-renewing and differentiation-related microRNAs and transcription factors in multilineage mouse hematopoietic stem/progenitor cells induced by 1,4-benzoquinone
Source: PeerJ. 2023 Jul 10;11:e15608. doi: 10.7717/peerj.15608 (PMC10340113; doi:10.7717/peerj.15608)
Supplement: Supplemental Information 1 [file peerj-11-15608-s001.xlsx]

## Sheet: miR-196b
	miR-196b Gene Expression
	A) Fold change calculation using Livak method									B) Relative gene expression calculation											Controls:	13.1167
																					Control Erythroid	16.315
	Sample	196	U6	∆CT	∆∆CT	Fold					BM Plot - Raw				BM Plot - Relative						Control Pre-B Lymphoid	15.3833
	BM 0 1	33.91	20.49	13.42	0.303333	1.45034	0.536389				0	1.25	2.5	5	0	1.25	2.5	5			Control Myeloid	15.2833
	BM 0 2	33.51	20.56	12.95	-0.166667	1.12246	0.166667				0.810378	0.66281	0.272942	0.0978467	0.801772	0.655771	0.270043	0.0968075
	BM 0 3	33.66	20.68	12.98	-0.136667	1.09936	0.136667				1.12246	0.649169	0.337198	0.102711	1.11054	0.642275	0.333617	0.10162
	BM 1.25 1	34.2	20.49	13.71	0.593333	0.66281	-0.593333				1.09936	0.810378	0.366445	0.11162	1.08769	0.801772	0.362553	0.110435
	BM 1.25 2	34.3	20.56	13.74	0.623333	0.649169	-0.623333
	BM 1.25 3	34.1	20.68	13.42	0.303333	0.810378	-0.303333			Mean	1.01073	0.707452	0.325528	0.104059	1	0.699939	0.322071	0.102954
	BM 2.5 1	35.48	20.49	14.99	1.87333	0.272942	-1.87333			SD	0.173898	0.0893967	0.0478311	0.00698488	0.172051	0.0884473	0.0473231	0.0069107
	BM 2.5 2	35.245	20.56	14.685	1.56833	0.337198	-1.56833			n	3	3	3	3	3	3	3	3
	BM 2.5 3	35.245	20.68	14.565	1.44833	0.366445	-1.44833			SEM	0.1004	0.0516132	0.0276153	0.00403272	0.0993335	0.0510651	0.027322	0.00398989
	BM 5 1	36.96	20.49	16.47	3.35333	0.0978467	-3.35333
	BM 5 2	36.96	20.56	16.4	3.28333	0.102711	-3.28333
	BM 5 3	36.96	20.68	16.28	3.16333	0.11162	-3.16333
	Erythroid 0 1	39.82	20.49	19.33	3.015	0.123707	-3.015				Erythroid Plot - Raw				Erythroid Plot - Relative
	Erythroid 0 2	35.695	20.56	15.135	-1.18	2.26577	1.18
	Erythroid 0 3	35.16	20.68	14.48	-1.835	3.56771	1.835				0	1.25	2.5	5	0	1.25	2.5	5
	Erythroid 1.25 1	37.12	20.49	16.63	0.315	0.803851	-0.315				0.123707	0.803851	2.07053	12.9511	0.062298	0.404814	1.0427	6.52207
	Erythroid 1.25 2	37.12	20.56	16.56	0.245	0.843816	-0.245				2.26577	0.843816	1.72907	3.71922	1.14103	0.42494	0.87075	1.87297
	Erythroid 1.25 3	37.12	20.68	16.44	0.125	0.917004	-0.125				3.56771	0.917004	2.36199	7.03719	1.79668	0.461797	1.18948	3.54388
	Erythroid 2.5 1	35.755	20.49	15.265	-1.05	2.07053	1.05
	Erythroid 2.5 2	36.085	20.56	15.525	-0.79	1.72907	0.79			Mean	1.98573	0.85489	2.05386	7.9025	1	0.443368	1.03431	2.70843
	Erythroid 2.5 3	35.755	20.68	15.075	-1.24	2.36199	1.24			SD	1.739	0.0573837	0.316784	4.67636	0.875747	0.0260619	0.15953	1.18151
	Erythroid 5.0 1	33.11	20.49	12.62	-3.695	12.9511	3.695			n	3	3	3	3	3	3	3	3
	Erythroid 5.0 2	34.98	20.56	14.42	-1.895	3.71922	1.895			SEM	1.00401	0.0331305	0.182896	2.6999	0.505613	0.0150469	0.092105	0.682146
	Erythroid 5.0 3	34.18	20.68	13.5	-2.815	7.03719	2.815
	Pre-B Lymphoid 0 1	36.2333	20.49	15.7433	0.36	0.779165	-0.36				Pre-B Lymphoid Plot - Raw				Pre-B Lymphoid Plot - Relative
	Pre-B Lymphoid 0 2	35.82	20.56	15.26	-0.123333	1.08925	0.123333
	Pre-B Lymphoid 0 3	35.8267	20.68	15.1467	-0.236667	1.17827	0.236667				0	1.25	2.5	5	0	1.25	2.5	5
	Pre-B Lymphoid 1.25 1	35.9767	20.49	15.4867	0.103333	0.93088	-0.103333				0.779165	0.93088	2.89454	9.14722	0.767226	0.916617	2.85019	9.00707
	Pre-B Lymphoid 1.25 2	35.1533	20.56	14.5933	-0.79	1.72907	0.79				1.08925	1.72907	3.03845	9.21084	1.07256	1.70258	2.99189	9.06972
	Pre-B Lymphoid 1.25 3	34.7633	20.68	14.0833	-1.3	2.46229	1.3				1.17827	2.46229	4.33691	10.6295	1.16021	2.42456	4.27046	10.4666
	Pre-B Lymphoid 2.5 1	34.34	20.49	13.85	-1.53333	2.89454	1.53333			Mean	1.01556	1.70741	3.4233	9.66252	1	0.916617	2.92104	9.51447
	Pre-B Lymphoid 2.5 2	34.34	20.56	13.78	-1.60333	3.03845	1.60333			SD	0.209507	0.765934	0.794475	0.838024	0.206297	0.555761	0.100198	0.825184
	Pre-B Lymphoid 2.5 3	33.9467	20.68	13.2667	-2.11667	4.33691	2.11667			n	3	3	3	3	3	3	3	3
	Pre-B Lymphoid 5.0 1	32.68	20.49	12.19	-3.19333	9.14722	3.19333			SEM	0.120959	0.442212	0.45869	0.483834	0.119106	0.320869	0.0578496	0.47642
	Pre-B Lymphoid 5.0 2	32.74	20.56	12.18	-3.20333	9.21084	3.20333
	Pre-B Lymphoid 5.0 3	32.6533	20.68	11.9733	-3.41	10.6295	3.41
	Myeloid 0 1	38.49	20.49	18	2.71667	0.152125	-2.71667				Myeloid Plot - Raw				Myeloid Plot - Relative
	Myeloid 0 2	34.56	20.56	14	-1.28333	2.43401	1.28333
	Myeloid 0 3	34.53	20.68	13.85	-1.43333	2.7007	1.43333				0	1.25	2.5	5	0	1.25	2.5	5
	Myeloid 1.25 1	37.24	20.49	16.75	1.46667	0.361817	-1.46667				0.152125	0.361817	32.9757	51.0321	0.0863232	0.205312	18.712	28.958
	Myeloid 1.25 2	36.04	20.56	15.48	0.196667	0.872564	-0.196667				2.43401	0.872564	34.6152	49.9819	1.38117	0.495134	19.6423	28.3621
	Myeloid 1.25 3	35.49	20.68	14.81	-0.473333	1.38831	0.473333				2.7007	1.38831	37.6175	50.6796	1.53251	0.787795	21.346	28.758
	Myeloid 2.5 1	30.73	20.49	10.24	-5.04333	32.9757	5.04333			Mean	1.76228	0.874232	35.0695	50.5645	1	0.496081	20.4941	28.6927
	Myeloid 2.5 2	30.73	20.56	10.17	-5.11333	34.6152	5.11333			SD	1.40079	0.51325	2.35401	0.534485	0.794877	0.291243	1.33577	0.303292
	Myeloid 2.5 3	30.73	20.68	10.05	-5.23333	37.6175	5.23333			n	3	3	3	3	3	3	3	3
	Myeloid 5.0 1	30.1	20.49	9.61	-5.67333	51.0321	5.67333			SEM	0.808749	0.296325	1.35909	0.308585	0.458922	0.168149	0.77121	0.175106
	Myeloid 5.0 2	30.2	20.56	9.64	-5.64333	49.9819	5.64333
	Myeloid 5.0 3	30.3	20.68	9.62	-5.66333	50.6796	5.66333

## Sheet: miR-181a
	miR-181a Gene Expression
	A) Fold change calculation using Livak method									B) Relative gene expression calculation
	Sample	181a	U6	∆CT	∆∆CT	Fold					BM Plot - Raw				BM Plot - Relative						Controls:	11.0867
	BM 0 1	31.69	20.49	11.2	0.113333	0.92445	-0.113333				0	1.25	2.5	5	0	1.25	2.5	5			Control Erythroid	14.2767
	BM 0 2	31.81	20.56	11.25	0.163333	0.89296	-0.163333				0.92445	0.515246	0.381565	0.18471	0.915659	0.510346	0.377936	0.182953			Control Pre-B Lymphoid	16.8933
	BM 0 3	31.49	20.68	10.81	-0.276667	1.21139	0.276667				0.89296	0.517632	0.538369	0.113702	0.884468	0.51271	0.533249	0.112621			Control Myeloid	12.8511
	BM 1.25 1	32.5333	20.49	12.0433	0.956667	0.515246	-0.956667				1.21139	0.786399	0.66281	0.228986	1.19987	0.778921	0.656507	0.226809
	BM 1.25 2	32.5967	20.56	12.0367	0.95	0.517632	-0.95
	BM 1.25 3	32.1133	20.68	11.4333	0.346667	0.786399	-0.346667			Mean	1.0096	0.606426	0.527581	0.1758	1	0.600659	0.522564	0.174128
	BM 2.5 1	32.9667	20.49	12.4767	1.39	0.381565	-1.39			SD	0.175465	0.155866	0.140932	0.0581562	0.173796	0.154384	0.139592	0.0576032
	BM 2.5 2	32.54	20.56	11.98	0.893333	0.538369	-0.893333			n	3	3	3	3	3	3	3	3
	BM 2.5 3	32.36	20.68	11.68	0.593333	0.66281	-0.593333			SEM	0.101305	0.0899892	0.0813674	0.0335765	0.100341	0.0891335	0.0805936	0.0332572
	BM 5 1	34.0133	20.49	13.5233	2.43667	0.18471	-2.43667
	BM 5 2	34.7833	20.56	14.2233	3.13667	0.113702	-3.13667
	BM 5 3	33.8933	20.68	13.2133	2.12667	0.228986	-2.12667
	Erythroid 0 1	34.4467	20.49	13.9567	-0.32	1.24833	0.32				Erythroid Plot - Raw				Erythroid Plot - Relative
	Erythroid 0 2	34.93	20.56	14.37	0.0933333	0.937354	-0.0933333
	Erythroid 0 3	35.1833	20.68	14.5033	0.226667	0.854607	-0.226667				0	1.25	2.5	5	0	1.25	2.5	5
	Erythroid 1.25 1	36.2	20.49	15.71	1.43333	0.370274	-1.43333				1.24833	0.370274	0.589134	0.293209	1.23179	0.365367	0.581326	0.289323
	Erythroid 1.25 2	35.0433	20.56	14.4833	0.206667	0.866537	-0.206667				0.937354	0.866537	0.494257	0.573024	0.924932	0.858297	0.487707	0.56543
	Erythroid 1.25 3	35.23	20.68	14.55	0.273333	0.827406	-0.273333				0.854607	0.827406	0.540238	0.391387	0.843281	0.819538	0.535101	0.3862
	Erythroid 2.5 1	35.53	20.49	15.04	0.763333	0.589134	-0.763333
	Erythroid 2.5 2	35.8533	20.56	15.2933	1.01667	0.494257	-1.01667			Mean	1.01343	0.688072	0.541209	0.419206	1	0.838917	0.534711	0.413651
	Erythroid 2.5 3	35.845	20.68	15.165	0.888333	0.540238	-0.888333			SD	0.207594	0.275916	0.0474457	0.141967	0.204843	0.027407	0.0468108	0.140085
	Erythroid 5.0 1	36.5367	20.49	16.0467	1.77	0.293209	-1.77			n	3	3	3	3	3	3	3	3
	Erythroid 5.0 2	35.64	20.56	15.08	0.803333	0.573024	-0.803333			SEM	0.119854	0.1593	0.0273928	0.0819645	0.118266	0.0158234	0.0270262	0.0808783
	Erythroid 5.0 3	36.31	20.68	15.63	1.35333	0.391387	-1.35333
	Pre-B Lymphoid 0 1	39	20.49	18.51	1.61667	0.326088	-1.61667				Pre-B Lymphoid Plot - Raw				Pre-B Lymphoid Plot - Relative
	Pre-B Lymphoid 0 2	36.4	20.56	15.84	-1.05333	2.07532	1.05333
	Pre-B Lymphoid 0 3	37.01	20.68	16.33	-0.563333	1.47768	0.563333				0	1.25	2.5	5	0	1.25	2.5	5
	Pre-B Lymphoid 1.25 1	38.73	20.49	18.24	1.34667	0.393199	-1.34667				0.326088	0.393199	1.43727	26.477	0.252189	0.304092	1.11155	20.4767
	Pre-B Lymphoid 1.25 2	37.715	20.56	17.155	0.261667	0.834124	-0.261667				2.07532	0.834124	1.50873	18.507	1.60501	0.645093	1.16682	14.3129
	Pre-B Lymphoid 1.25 3	36.86	20.68	16.18	-0.713333	1.63959	0.713333				1.47768	1.63959	1.63959	17.7942	1.1428	1.26802	1.26802	13.7616
	Pre-B Lymphoid 2.5 1	36.86	20.49	16.37	-0.523333	1.43727	0.523333
	Pre-B Lymphoid 2.5 2	36.86	20.56	16.3	-0.593333	1.50873	0.593333			Mean	1.29303	0.955637	1.52853	20.9261	1	0.474592	1.18213	14.0373
	Pre-B Lymphoid 2.5 3	36.86	20.68	16.18	-0.713333	1.63959	0.713333			SD	0.889114	0.632017	0.102601	4.82044	0.687621	0.241124	0.0793494	0.389821
	Pre-B Lymphoid 5.0 1	32.6567	20.49	12.1667	-4.72667	26.477	4.72667			n	3	3	3	3	3	3	3	3
	Pre-B Lymphoid 5.0 2	33.2433	20.56	12.6833	-4.21	18.507	4.21			SEM	0.51333	0.364895	0.0592368	2.78308	0.396998	0.139213	0.0458124	0.225063
	Pre-B Lymphoid 5.0 3	33.42	20.68	12.74	-4.15333	17.7942	4.15333
	Myeloid 0 1	33.43	20.49	12.94	0.0888889	0.940247	-0.0888889				Myeloid Plot - Raw				Myeloid Plot - Relative
	Myeloid 0 2	33.44	20.56	12.88	0.0288889	0.980175	-0.0288889
	Myeloid 0 3	33.4133	20.68	12.7333	-0.117778	1.08506	0.117778				0	1.25	2.5	5	0	1.25	2.5	5
	Myeloid 1.25 1	34.37	20.49	13.88	1.02889	0.490087	-1.02889				0.940247	0.490087	0.395325	0.233978	0.938531	0.489193	0.394604	0.233551
	Myeloid 1.25 2	33.47	20.56	12.91	0.0588889	0.960003	-0.0588889				0.980175	0.960003	0.543786	0.256633	0.978386	0.958252	0.542794	0.256165
	Myeloid 1.25 3	33.8933	20.68	13.2133	0.362222	0.777965	-0.362222				1.08506	0.777965	0.953372	0.301684	1.08308	0.776546	0.951632	0.301134
	Myeloid 2.5 1	34.68	20.49	14.19	1.33889	0.395325	-1.33889
	Myeloid 2.5 2	34.29	20.56	13.73	0.878889	0.543786	-0.878889			Mean	1.00183	0.742685	0.630828	0.264098	1	0.867399	0.468699	0.263616
	Myeloid 2.5 3	33.6	20.68	12.92	0.0688889	0.953372	-0.0688889			SD	0.0747966	0.236936	0.289026	0.034465	0.0746601	0.128485	0.104786	0.0344021
	Myeloid 5.0 1	35.4367	20.49	14.9467	2.09556	0.233978	-2.09556			n	3	3	3	3	3	3	3	3
	Myeloid 5.0 2	35.3733	20.56	14.8133	1.96222	0.256633	-1.96222			SEM	0.0431838	0.136795	0.166869	0.0198984	0.043105	0.074181	0.0604984	0.0198621
	Myeloid 5.0 3	35.26	20.68	14.58	1.72889	0.301684	-1.72889

## Sheet: miR-29a
	miR-29a Gene Expression
	A) Fold change calculation using Livak method									B) Relative gene expression calculation
	Sample	29a	U6	∆CT	∆∆CT	Fold					BM Plot - Raw				BM Plot - Relative						Controls:	10.1933
	BM 0 1	30.79	20.49	10.3	0.106667	0.928731	-0.106667				0	1.25	2.5	5	0	1.25	2.5	5			Control Erythroid	11.8289
	BM 0 2	30.79	20.56	10.23	0.0366667	0.974905	-0.0366667				0.928731	0.463294	0.469761	0.420448	0.926234	0.462048	0.468498	0.419317			Control Pre-B Lymphoid	10.3133
	BM 0 3	30.73	20.68	10.05	-0.143333	1.10445	0.143333				0.974905	0.48971	1.59107	1.72508	0.972283	0.488393	1.58679	1.72044			Control Myeloid	13.44
	BM 1.25 1	31.7933	20.49	11.3033	1.11	0.463294	-1.11				1.10445	0.570382	1.85318	1.93187	1.10148	0.568848	1.84819	1.92668
	BM 1.25 2	31.7833	20.56	11.2233	1.03	0.48971	-1.03
	BM 1.25 3	31.6833	20.68	11.0033	0.81	0.570382	-0.81			Mean	1.0027	0.507795	1.30467	1.35913	1	0.50643	1.71749	1.82356
	BM 2.5 1	31.7733	20.49	11.2833	1.09	0.469761	-1.09			SD	0.0910983	0.0557876	0.734833	0.819475	0.0908533	0.0568901	0.184836	0.145828
	BM 2.5 2	30.0833	20.56	9.52333	-0.67	1.59107	0.67			n	3	3	3	3	3	3	3	3
	BM 2.5 3	29.9833	20.68	9.30333	-0.89	1.85318	0.89			SEM	0.0525956	0.032209	0.424256	0.473124	0.0524542	0.0328455	0.106715	0.084194
	BM 5 1	31.9333	20.49	11.4433	1.25	0.420448	-1.25
	BM 5 2	29.9667	20.56	9.40667	-0.786667	1.72508	0.786667
	BM 5 3	29.9233	20.68	9.24333	-0.95	1.93187	0.95
	Erythroid 0 1	32.8433	20.49	12.3533	0.524444	0.695227	-0.524444
	Erythroid 0 2	32.1567	20.56	11.5967	-0.232222	1.17464	0.232222				Erythroid Plot - Raw				Erythroid Plot - Relative
	Erythroid 0 3	32.2167	20.68	11.5367	-0.292222	1.22452	0.292222
	Erythroid 1.25 1	32.53	20.49	12.04	0.211111	0.863872	-0.211111				0	1.25	2.5	5	0	1.25	2.5	5
	Erythroid 1.25 2	32.82	20.56	12.26	0.431111	0.74169	-0.431111				0.695227	0.863872	0.351652	0.191961	0.674019	0.837519	0.340925	0.186106
	Erythroid 1.25 3	32.6533	20.68	11.9733	0.144444	0.904728	-0.144444				1.17464	0.74169	0.500771	0.248082	1.13881	0.719065	0.485495	0.240514
	Erythroid 2.5 1	33.8267	20.49	13.3367	1.50778	0.351652	-1.50778				1.22452	0.904728	0.467236	0.325085	1.18717	0.877129	0.452983	0.315168
	Erythroid 2.5 2	33.3867	20.56	12.8267	0.997778	0.500771	-0.997778
	Erythroid 2.5 3	33.6067	20.68	12.9267	1.09778	0.467236	-1.09778			Mean	1.03146	0.836763	0.439886	0.255043	1	0.811238	0.426468	0.247263
	Erythroid 5.0 1	34.7	20.49	14.21	2.38111	0.191961	-2.38111			SD	0.292257	0.0848319	0.0782308	0.0668342	0.283342	0.0822441	0.0758444	0.0647954
	Erythroid 5.0 2	34.4	20.56	13.84	2.01111	0.248082	-2.01111			n	3	3	3	3	3	3	3	3
	Erythroid 5.0 3	34.13	20.68	13.45	1.62111	0.325085	-1.62111			SEM	0.168735	0.0489777	0.0451666	0.0385867	0.163587	0.0474836	0.0437888	0.0374096
	Pre-B Lymphoid 0 1	31.0133	20.49	10.5233	0.21	0.864537	-0.21
	Pre-B Lymphoid 0 2	30.8567	20.56	10.2967	-0.0166667	1.01162	0.0166667				Pre-B Lymphoid Plot - Raw				Pre-B Lymphoid Plot - Relative
	Pre-B Lymphoid 0 3	30.8	20.68	10.12	-0.193333	1.1434	0.193333
	Pre-B Lymphoid 1.25 1	31.44	20.49	10.95	0.636667	0.643197	-0.636667				0	1.25	2.5	5	0	1.25	2.5	5
	Pre-B Lymphoid 1.25 2	30.9567	20.56	10.3967	0.0833333	0.943874	-0.0833333				0.864537	0.643197	0.484085	0.470848	0.858937	0.639031	0.48095	0.467798
	Pre-B Lymphoid 1.25 3	30.9733	20.68	10.2933	-0.02	1.01396	0.02				1.01162	0.943874	0.638754	0.526072	1.00507	0.93776	0.634617	0.522665
	Pre-B Lymphoid 2.5 1	31.85	20.49	11.36	1.04667	0.484085	-1.04667				1.1434	1.01396	0.874583	0.607097	1.136	1.00739	0.868918	0.603165
	Pre-B Lymphoid 2.5 2	31.52	20.56	10.96	0.646667	0.638754	-0.646667
	Pre-B Lymphoid 2.5 3	31.1867	20.68	10.5067	0.193333	0.874583	-0.193333			Mean	1.00652	0.86701	0.665807	0.534673	1	0.972576	0.751767	0.495231
	Pre-B Lymphoid 5.0 1	31.89	20.49	11.4	1.08667	0.470848	-1.08667			SD	0.139503	0.19697	0.196649	0.0685306	0.138599	0.0492367	0.165676	0.0387966
	Pre-B Lymphoid 5.0 2	31.8	20.56	11.24	0.926667	0.526072	-0.926667			n	3	3	3	3	3	3	3	3
	Pre-B Lymphoid 5.0 3	31.7133	20.68	11.0333	0.72	0.607097	-0.72			SEM	0.0805418	0.113721	0.113536	0.0395662	0.0800201	0.0284268	0.0956528	0.0223992
	Myeloid 0 1	34.2767	20.49	13.7867	0.346667	0.786399	-0.346667
	Myeloid 0 2	33.7333	20.56	13.1733	-0.266667	1.20303	0.266667				Myeloid Plot - Raw				Myeloid Plot - Relative
	Myeloid 0 3	34.04	20.68	13.36	-0.08	1.05702	0.08
	Myeloid 1.25 1	33.9933	20.49	13.5033	0.0633333	0.95705	-0.0633333				0	1.25	2.5	5	0	1.25	2.5	5
	Myeloid 1.25 2	37.12	20.56	16.56	3.12	0.115023	-3.12				0.786399	0.95705	1.05458	2.14355	0.774411	0.94246	1.0385	2.11087
	Myeloid 1.25 3	36.08	20.68	15.4	1.96	0.257028	-1.96				1.20303	0.115023	1.48796	2.54912	1.18469	0.11327	1.46527	2.51026
	Myeloid 2.5 1	33.8533	20.49	13.3633	-0.0766667	1.05458	0.0766667				1.05702	0.257028	1.17827	0.959264	1.0409	0.25311	1.1603	0.94464
	Myeloid 2.5 2	33.4267	20.56	12.8667	-0.573333	1.48796	0.573333
	Myeloid 2.5 3	33.8833	20.68	13.2033	-0.236667	1.17827	0.236667			Mean	1.01548	0.443034	1.24027	1.88398	1	0.18319	1.22136	2.31056
	Myeloid 5.0 1	32.83	20.49	12.34	-1.1	2.14355	1.1			SD	0.211396	0.450778	0.223243	0.826101	0.208173	0.0988819	0.21984	0.282412
	Myeloid 5.0 2	32.65	20.56	12.09	-1.35	2.54912	1.35			n	3	3	3	3	3	3	3	3
	Myeloid 5.0 3	34.18	20.68	13.5	0.06	0.959264	-0.06			SEM	0.12205	0.260257	0.128889	0.47695	0.120189	0.0570895	0.126924	0.163051
