# Supplementary material for: Analysis of self-renewing and differentiation-related microRNAs and transcription factors in multilineage mouse hematopoietic stem/progenitor cells induced by 1,4-benzoquinone
Source: PeerJ. 2023 Jul 10;11:e15608. doi: 10.7717/peerj.15608 (PMC10340113; doi:10.7717/peerj.15608)
Supplement: Supplemental Information 2 [file peerj-11-15608-s002.xlsx]

## Sheet: Bmi-1
											Concentration	Measurement	Concentration	Measurement
	A) Establishment of standard curve										1	0.05088	32	0.308
											1.073	0.05114	32	0.308
	a	0.04921									1.152	0.05144	16	0.246
	b	2.06									1.236	0.05179	16	0.246
	c	12.35									1.327	0.05219	8	0.115
	d	0.3478									1.424	0.05265	8	0.127
	MSE	0.000139									1.529	0.05318	4	0.085
	R²	0.9858									1.641	0.0538	4	0.099
	SS	0.001668									1.761	0.05451	2	0.061
	SYX	0.01444									1.89	0.05532	2	0.062
											2.028	0.05626	1	0.04
											2.177	0.05733	1	0.037
											2.337	0.05857
											2.508	0.05999
											2.692	0.06161
											2.889	0.06346
											3.101	0.06557
											3.328	0.06798
											3.572	0.07071
	Calibrator	Wells	Concentration (ng/ml)	Raw (Corrected)	SEM	Backfit	Recovery %				3.834	0.07381
	Standard1	A1	32	0.308	0	30.64	95.75				4.115	0.0773
		A2		0.308		30.64	95.75				4.416	0.08124
	Standard2	A3	16	0.246	0	17.01	106.3				4.74	0.08565
		A4		0.246		17.01	106.3				5.087	0.09057
	Standard3	A5	8	0.115	0.006	6.689	83.61				5.46	0.09604
	Standard4	A7	4	0.085	0.007	4.693	117.3				6.29	0.1087
		A8		0.099		5.657	141.4				6.751	0.116
	Standard5	A9	2	0.061	0.0005	2.624	131.2				7.246	0.1238
		A10		0.062		2.735	136.7				7.777	0.1323
	Standard6	A11	1	0.04	0.0015	< Curve	-				8.347	0.1413
		A12		0.037		< Curve	-				8.959	0.1508
											9.615	0.1608
	B) Protein concentration calculation for respective experimental group										10.32	0.1712
	Sample	Wells	Raw	Background Corrected	Concentration (ng/ml)	Concentration (Average) (ng/ml)	%CV	SD	SEM		11.08	0.1818
	BM 0 1	B3	0.103	0.0625	2.841	2.788	2.7	0.0754	0.0533		11.89	0.1926
		B4	0.102		2.735						12.76	0.2035
	BM 0 2	B5	0.098	0.059	2.264	2.387	7.26	0.173	0.123		13.69	0.2143
		B6	0.1		2.51						14.7	0.225
	BM 0 3	B7	0.104	0.0625	2.945	2.785	8.13	0.226	0.16		15.78	0.2354
		B8	0.101		2.624						16.93	0.2454
	BM 1.25 1	B9	0.115	0.0765	3.931	4.05	4.15	0.168	0.119		18.17	0.2549
		B10	0.118		4.169						19.5	0.264
	BM 1.25 2	B11	0.107	0.066	3.237	3.141	4.33	0.136	0.0963		20.93	0.2725
		B12	0.105		3.045						22.47	0.2804
	BM 1.25 3	C1	0.119	0.0795	4.247	4.285	1.26	0.054	0.0382		24.11	0.2877
		C2	0.12		4.323						25.88	0.2944
	BM 2.5 1	C3	0.126	0.085	4.765	4.693	2.18	0.102	0.0723		27.78	0.3005
		C4	0.124		4.621						29.81	0.306
	BM 2.5 2	C5	0.122	0.0815	4.473	4.436	1.19	0.0529	0.0374		32	0.311
		C6	0.121		4.399
	BM 2.5 3	C7	0.121	0.08	4.399	4.323	2.49	0.107	0.076
		C8	0.119		4.247
	BM 5 1	C9	0.134	0.095	5.322	5.39	1.77	0.0954	0.0675
		C10	0.136		5.457
	BM 5 2	C11	0.13	0.0895	5.048	5.013	0.985	0.0494	0.0349
		C12	0.129		4.978
	BM 5 3	D1	0.138	0.0975	5.591	5.558	0.848	0.0471	0.0333
		D2	0.137		5.524
	BM 7 1	D3	0.141	0.101	5.789	5.822	0.796	0.0463	0.0328
		D4	0.142		5.855
	BM 7 2	D5	0.143	0.104	5.92	5.985	1.53	0.0918	0.0649
		D6	0.145		6.05
	BM 7 3	D7	0.144	0.102	5.985	5.854	3.16	0.185	0.131
		D8	0.14		5.723
	BM 12 1	D9	0.161	0.123	7.067	7.193	2.47	0.178	0.126
		D10	0.165		7.319
	BM 12 2	D11	0.159	0.121	6.941	7.067	2.52	0.178	0.126
		D12	0.163		7.193
	BM 12 3	E1	0.167	0.126	7.444	7.381	1.2	0.0888	0.0628
		E2	0.165		7.319
	Blank	B1	0.042	0	< Curve	-	-	-	-
		B2	0.038		< Curve
