# Supplementary material for: Analysis of self-renewing and differentiation-related microRNAs and transcription factors in multilineage mouse hematopoietic stem/progenitor cells induced by 1,4-benzoquinone
Source: PeerJ. 2023 Jul 10;11:e15608. doi: 10.7717/peerj.15608 (PMC10340113; doi:10.7717/peerj.15608)
Supplement: Supplemental Information 3 [file peerj-11-15608-s003.xlsx]

## Sheet: GATA3
											Concentration	Measurement	Concentration	Measurement
	A) Establishment of standard curve										15.63	0.01976	1000	0.3095
											17.01	0.02011	1000	0.2895
	a	0.01747									18.52	0.0205	500	0.2435
	b	1.649									20.16	0.02095	500	0.2225
	c	311.1									21.94	0.02147	250	0.1625
	d	0.3384									23.88	0.02206	250	0.1455
	MSE	6.294e-05									26	0.02274	125	0.0705
	R²	0.9941									28.3	0.02351	125	0.0805
	SS	0.0008812									30.81	0.0244	62.5	0.0335
	SYX	0.009387									33.54	0.02542	62.5	0.0355
											36.51	0.02658	31.25	0.0205
											39.75	0.0279	31.25	0.0235
											47.1	0.03113	15.63	0.0305
											51.27	0.03308
											55.81	0.0353
											60.76	0.0378
											66.14	0.04064
											72	0.04383
	Calibrator	Wells	Concentration (pg/ml)	Raw (Corrected)	SEM	Backfit	Recovery %				78.37	0.04743
	Standard1	A1	1000	0.31	0.01	1264	126.4				85.32	0.05145
		A2		0.29		880.5	88.05				92.87	0.05594
	Standard2	A3	500	0.243	0.0105	526.5	105.3				101.1	0.06094
		A4		0.223		439.6	87.92				110.1	0.06648
	Standard3	A5	250	0.163	0.0085	276.7	110.7				119.8	0.07257
		A6		0.146		242.6	97.04				130.4	0.07926
	Standard4	A7	125	0.0705	0.005	116.5	93.2				142	0.08655
		A8		0.0805		132.4	105.9				154.5	0.09444
	Standard5	A9	62.5	0.0335	0.001	52.15	83.43				168.2	0.1029
		A10		0.0355		56.22	89.96				183.1	0.112
	Standard6	A11	31.25	0.0205	0.0015	18.52	59.26				199.4	0.1216
		A12		0.0235		28.27	90.46				217	0.1316
	Standard7	B1	15.63	0.0195	0.0055	14.5	92.81				236.2	0.1421
		B2		0.0305		45.72	292.6				257.2	0.153
											280	0.164
	B) Protein concentration calculation for respective experimental group										304.8	0.1752
	Sample	Wells	Raw	Background Corrected	Concentration (pg/ml)	Concentration (Average) (pg/ml)	%CV	SD	SEM		331.7	0.1864
	BM 0 1	B5	0.062	0.0225	25.28	25.28	0	0	0		361.1	0.1976
		B6	0.062		25.28						393.1	0.2085
	BM 0 2	B7	0.063	0.023	28.27	26.77	7.9	2.12	1.5		427.9	0.2192
		B8	0.062		25.28						465.9	0.2295
	BM 0 3	B9	0.062	0.023	25.28	26.77	7.9	2.12	1.5		507.1	0.2393
		B10	0.063		28.27						552	0.2486
	BM 1.25 1	B11	0.072	0.034	50.05	53.14	8.22	4.37	3.09		600.9	0.2574
		B12	0.075		56.22						654.2	0.2656
	BM 1.25 2	C1	0.065	0.027	33.76	37.46	14	5.24	3.7		712.1	0.2732
		C2	0.068		41.16						775.2	0.2801
	BM 1.25 3	C3	0.074	0.037	54.2	59.1	11.7	6.93	4.9		843.9	0.2865
		C4	0.079		64						918.6	0.2923
	BM 2.5 1	C5	0.083	0.045	71.39	74.07	5.11	3.79	2.68		1000	0.2976
		C6	0.086		76.75
	BM 2.5 2	C7	0.085	0.0465	74.98	76.74	3.25	2.49	1.76
		C8	0.087		78.5
	BM 2.5 3	C9	0.084	0.046	73.19	75.85	4.95	3.75	2.66
		C10	0.087		78.5
	BM 5 1	C11	0.094	0.055	90.47	91.3	1.29	1.18	0.835
		C12	0.095		92.14
	BM 5 2	D1	0.096	0.0555	93.8	92.13	2.56	2.36	1.67
		D2	0.094		90.47
	BM 5 3	D3	0.095	0.0535	92.14	88.77	5.36	4.76	3.37
		D4	0.091		85.4
	BM 7 1	D5	0.12	0.083	132.4	136.3	4.11	5.61	3.96
		D6	0.125		140.3
	BM 7 2	D7	0.129	0.089	146.7	145.9	0.771	1.13	0.796
		D8	0.128		145.1
	BM 7 3	D9	0.126	0.085	141.9	139.5	2.41	3.37	2.38
		D10	0.123		137.1
	BM 12 1	D11	0.151	0.113	182.3	185.7	2.55	4.73	3.35
		D12	0.155		189
	BM 12 2	E1	0.159	0.116	195.8	190.7	3.76	7.17	5.07
		E2	0.153		185.7
	BM 12 3	E3	0.157	0.116	192.4	190.7	1.25	2.39	1.69
		E4	0.155		189
	Blank	B3	0.037	0	< Curve	-	-	-	-
		B4	0.042		< Curve
