# Supplementary material for: Analysis of self-renewing and differentiation-related microRNAs and transcription factors in multilineage mouse hematopoietic stem/progenitor cells induced by 1,4-benzoquinone
Source: PeerJ. 2023 Jul 10;11:e15608. doi: 10.7717/peerj.15608 (PMC10340113; doi:10.7717/peerj.15608)
Supplement: Supplemental Information 4 [file peerj-11-15608-s004.xlsx]

## Sheet: Hox-B4
											Concentration	Measurement	Concentration	Measurement
		A) Establishment of standard curve									0.1563	0.009847	10	0.5475
											0.1701	0.01024	10	0.5295
											0.1852	0.01067	5	0.2685
											0.2016	0.01116	5	0.2745
											0.2194	0.0117	2.5	0.1065
		a	0.006519								0.2388	0.0123	2.5	0.1245
		b	1.306								0.26	0.01298	1.25	0.0695
		c	19.02								0.283	0.01373	1.25	0.0575
		d	1.771								0.3081	0.01458	0.625	0.0265
		MSE	5.515e-05								0.3354	0.01552	0.625	0.0265
		R²	0.9983								0.3651	0.01656	0.3125	0.0145
		SS	0.0007722								0.3975	0.01773	0.3125	0.0125
		SYX	0.008787								0.4327	0.01904	0.1563	0.0155
											0.471	0.0205	0.1563	0.0015
											0.5127	0.02212
											0.5581	0.02393
											0.6076	0.02595
											0.6614	0.0282
											0.72	0.03071
	Calibrator	Wells	Concentration (ng/ml)	Raw (Corrected)	SEM	Backfit	Recovery %				0.7837	0.0335
	Standard1	A1	10	0.548	0.009	10.18	101.8				0.8532	0.03661
		A2		0.53		9.809	98.09				0.9287	0.04007
	Standard2	A3	5	0.269	0.003	4.993	99.85				1.011	0.04392
		A4		0.275		5.095	101.9				1.101	0.0482
	Standard3	A5	2.5	0.107	0.009	2.208	88.32				1.198	0.05296
		A6		0.125		2.527	101.1				1.304	0.05824
	Standard4	A7	1.25	0.0695	0.006	1.524	121.9				1.42	0.06411
		A8		0.0575		1.289	103.2				1.545	0.07062
	Standard5	A9	0.625	0.0265	0	0.6208	99.33				1.682	0.07783
		A10		0.0265		0.6208	99.33				1.831	0.08581
	Standard6	A11	0.3125	0.0145	0.001	0.3059	97.88				1.994	0.09464
		A12		0.0125		0.2451	78.42				2.17	0.1044
	Standard7	B1	0.1563	0.0155	0.007	0.335	214.4				2.362	0.1152
		B2		0.0015		< Curve	-				2.572	0.127
											2.8	0.1401
		B) Protein concentration calculation for respective experimental group									3.048	0.1544
	Sample	Wells	Raw	Background Corrected	Concentration (ng/ml)	Concentration (Average) (ng/ml)	%CV	SD	SEM		3.317	0.1702
	BM 0 1	B5	0.061	0.01	0.1436	0.1614	15.6	0.0252	0.0178		3.611	0.1874
		B6	0.062		0.1793						3.931	0.2062
	BM 0 2	B7	0.058	0.0075	< Curve	0.105	-	-	0		4.279	0.2267
		B8	0.06		0.105						4.659	0.249
	BM 0 3	B9	0.059	0.0075	0.06128	0.06128	0	0	0		5.071	0.2731
		B10	0.059		0.06128						5.52	0.2992
	BM 1.25 1	B11	0.074	0.023	0.5223	0.5349	3.32	0.0177	0.0125		6.009	0.3272
		B12	0.075		0.5474						6.542	0.3574
	BM 1.25 2	C1	0.067	0.0165	0.335	0.363	10.9	0.0397	0.028		7.121	0.3896
		C2	0.069		0.391						7.752	0.4238
	BM 1.25 3	C3	0.077	0.025	0.5966	0.5844	2.96	0.0173	0.0122		8.439	0.4602
		C4	0.076		0.5722						9.186	0.4986
	BM 2.5 1	C5	0.079	0.0295	0.6448	0.6915	9.56	0.0661	0.0467		10	0.5388
		C6	0.083		0.7382						10	0.5388
	BM 2.5 2	C7	0.086	0.035	0.8063	0.8174	1.93	0.0158	0.0112
		C8	0.087		0.8286
	BM 2.5 3	C9	0.085	0.034	0.7838	0.795	2	0.0159	0.0112
		C10	0.086		0.8063
	BM 5 1	C11	0.093	0.042	0.9595	0.9702	1.56	0.0151	0.0107
		C12	0.094		0.9809
	BM 5 2	D1	0.097	0.046	1.044	1.055	1.4	0.0148	0.0105
		D2	0.098		1.065
	BM 5 3	D3	0.095	0.042	1.002	0.9701	4.67	0.0453	0.0321
		D4	0.092		0.938
	BM 7 1	D5	0.124	0.073	1.581	1.591	0.846	0.0135	0.00952
		D6	0.125		1.601
	BM 7 2	D7	0.127	0.076	1.638	1.648	0.811	0.0134	0.00945
		D8	0.128		1.657
	BM 7 3	D9	0.126	0.074	1.62	1.61	0.834	0.0134	0.0095
		D10	0.125		1.601
	BM 12 1	D11	0.154	0.103	2.136	2.145	0.594	0.0127	0.009
		D12	0.155		2.154
	BM 12 2	E1	0.16	0.108	2.244	2.226	1.14	0.0253	0.0179
		E2	0.158		2.208
	BM 12 3	E3	0.157	0.105	2.19	2.172	1.17	0.0254	0.018
		E4	0.155		2.154
	Blank	B3	0.052	0	< Curve	-	-	-	-
		B4	0.051		< Curve
The highlighted samples are outside the range of the curve fit.
